# Supplementary material for: Open Questions in Cold Atmospheric Plasma Treatment in Head and Neck Cancer: A Systematic Review
Source: MDPI journal article supplement (doi:10.3390/ijms231810238), 2022-09-06
Supplement: s1 [file s1]

**Table S1** Search strategy input for PubMed, Web of Science and Scopus

| DATABASES              | SEARCH STRING                                                                                                                                                                                                                                                                                                                                                                                                                                                                                                                                                                                                                                                                                                                                                                                                                                                                                        |
|------------------------|------------------------------------------------------------------------------------------------------------------------------------------------------------------------------------------------------------------------------------------------------------------------------------------------------------------------------------------------------------------------------------------------------------------------------------------------------------------------------------------------------------------------------------------------------------------------------------------------------------------------------------------------------------------------------------------------------------------------------------------------------------------------------------------------------------------------------------------------------------------------------------------------------|
| <b>PubMed:</b>         | (cold atmospheric plasma OR cold plasma OR low temperature plasma OR kinpen med OR non-thermal atmospheric pressure plasma OR non thermal atmospheric pressure plasma OR cold physical plasma OR plasma medicine OR CAP OR plasma activated medium OR cold atmospheric-pressure plasma OR plasma activated liquid OR cold argon plasma) AND (head and neck tumors OR head and neck squamous cell carcinoma OR head and neck cancer OR head & neck cancer OR oral squamous cell carcinoma OR oral cancer OR oral squamous cell cancer OR OSCC OR oral oncology OR oral squamous cancer cell OR oral cavity squamous cell carcinoma) AND (therapy* or treat* OR application or attenuation OR efficacy OR action OR effect* OR target* OR response)                                                                                                                                                    |
| <b>Web of Science:</b> | <p>Set for search in all Databases by Topic under Documents (cold atmospheric plasma OR cold plasma OR low temperature plasma OR kinpen med OR non-thermal atmospheric pressure plasma OR non thermal atmospheric pressure plasma OR cold physical plasma OR plasma medicine OR CAP OR plasma activated medium OR cold atmospheric-pressure plasma OR plasma activated liquid OR cold argon plasma) AND (head and neck tumors OR head and neck squamous cell carcinoma OR head and neck cancer OR head &amp; neck cancer OR oral squamous cell carcinoma OR oral cancer OR oral squamous cell cancer OR OSCC OR oral oncology OR oral squamous cancer cell OR oral cavity squamous cell carcinoma) AND (therapy* or treat* OR application or attenuation OR efficacy OR action OR effect* OR target* OR response)</p> <p>In addition, Refined by NOT Document Types: Abstract and Review Article</p> |
| <b>Scopus:</b>         | ( ALL ( "cold atmospheric plasma" ) AND ALL ( "head and neck cancer" ) )                                                                                                                                                                                                                                                                                                                                                                                                                                                                                                                                                                                                                                                                                                                                                                                                                             |

**Table S2** Risk of Bias assessment in the included *in vitro* studies

| Author/year                                  | Condition of cell culture before treatment | Condition of cell culture during the treatment | Description of methodology to evaluate outcomes | Case control description | Multiple experiments performed | Description of plasma devices and settings |
|----------------------------------------------|--------------------------------------------|------------------------------------------------|-------------------------------------------------|--------------------------|--------------------------------|--------------------------------------------|
| Choi B.B. et al. 2012 <sup>37</sup>          | A                                          | A                                              | A                                               | A                        | A                              | A                                          |
| Han X. et al. 2013 <sup>23</sup>             | I                                          | A                                              | A                                               | A                        | A                              | A                                          |
| Chang J.W. et al. 2014 <sup>36</sup>         | A                                          | A                                              | A                                               | A                        | A                              | A                                          |
| Guerrero-Preston R. et al. 2014 <sup>5</sup> | A                                          | A                                              | A                                               | A                        | I                              | A                                          |
| Kang S.U. et al. 2014 <sup>73</sup>          | A                                          | A                                              | A                                               | A                        | I                              | A                                          |
| Kim S.Y. et al. 2015 <sup>74</sup>           | A                                          | A                                              | A                                               | A                        | A                              | A                                          |
| Welz C. et al. 2015 <sup>82</sup>            | A                                          | A                                              | A                                               | A                        | A                              | A                                          |
| Lee J.H. et al. 2016 <sup>54</sup>           | A                                          | A                                              | A                                               | A                        | A                              | A                                          |
| Chauvin J. et al. 2018 <sup>6</sup>          | A                                          | A                                              | A                                               | A                        | A                              | A                                          |
| Hasse S. et al. 2019 <sup>72</sup>           | A                                          | A                                              | A                                               | A                        | A                              | A                                          |
| Sato K. et al. 2019 <sup>80</sup>            | A                                          | A                                              | A                                               | A                        | A                              | A                                          |
| Han X. et al. 2020 <sup>71</sup>             | A                                          | A                                              | A                                               | A                        | I                              | A                                          |
| Lee C.M. et al. 2020 <sup>38</sup>           | A                                          | A                                              | A                                               | A                        | A                              | A                                          |
| Ramireddy L. et al. 2020 <sup>79</sup>       | A                                          | A                                              | A                                               | A                        | A                              | A                                          |
| Lin A. et al. 2021 <sup>76</sup>             | A                                          | A                                              | A                                               | A                        | A                              | A                                          |
| Oh C. et al. 2021 <sup>77</sup>              | A                                          | A                                              | A                                               | A                        | A                              | A                                          |
| Park J. et al. 2021 <sup>78</sup>            | A                                          | A                                              | A                                               | A                        | A                              | A                                          |
| Sklias K. et al. 2021 <sup>81</sup>          | A                                          | A                                              | A                                               | A                        | A                              | A                                          |
| Wu C.Y. et al. 2021 <sup>83</sup>            | A                                          | A                                              | A                                               | A                        | A                              | A                                          |

**Table S3** Risk of Bias assessment in the included *in vitro* studies

| Author/year                         | Sequence generation | Baseline characteristics | Allocation concealment | Random housing | Blinding | Random outcome assessment | Blinding | Incomplete outcome data | Selective outcome reporting | Other sources of bias |
|-------------------------------------|---------------------|--------------------------|------------------------|----------------|----------|---------------------------|----------|-------------------------|-----------------------------|-----------------------|
| Kang S.U. et al. 2014 <sup>73</sup> | A                   | A                        | N/A                    | N/A            | N/A      | N/A                       | A        | I                       | A                           | N/A                   |
| Kim S.Y. et al 2015 <sup>74</sup>   | A                   | A                        | N/A                    | N/A            | N/A      | N/A                       | I        | I                       | A                           | N/A                   |
| Oh C. et al 2021 <sup>77</sup>      | A                   | A                        | N/A                    | N/A            | N/A      | N/A                       | I        | A                       | A                           | N/A                   |

**Table S4** Risk of Bias assessment in the included *in vivo* studies with a case series study design according to Murad's checklist

| Author/year                              | Selection | Ascertainment of Exposure | Ascertainment of Outcome | Causality - alternative causes | Causality - follow-up | Reporting |
|------------------------------------------|-----------|---------------------------|--------------------------|--------------------------------|-----------------------|-----------|
| Metelmann H.R. et al. 2015 <sup>85</sup> | I         | A                         | A                        | A                              | A                     | A         |
| Metelmann H.R. et al. 2018 <sup>15</sup> | A         | A                         | A                        | A                              | A                     | A         |
| Schuster M. et al. 2018 <sup>87</sup>    | I         | A                         | A                        | A                              | A                     | A         |

**Table S5** Risk of Bias assessment according to NewCastle-Ottawa tool for human *in vivo* case-control study

| Author/year                      | Adequacy of case definition | Representativeness of the cases | Selection of controls | Definition of controls | Comparability cases/controls | Ascertainment of exposure | Same method of ascertainment | Nonresponse rate |
|----------------------------------|-----------------------------|---------------------------------|-----------------------|------------------------|------------------------------|---------------------------|------------------------------|------------------|
| Dai X. et al. 2020 <sup>84</sup> | A                           | A                               | A                     | A                      | A                            | A                         | A                            | N/A              |

**Table S6** Risk of Bias assessment according to NewCastle-Ottawa tool for human *in vivo* cohort study

| Author/year                           | Representativeness of exposed cohort | Selection of non-exposed cohort | Ascertainment of exposure | Demonstration that outcome of interest was not present at start of study | Comparability of cohorts on the basis of the design or analysis | Assessment of outcome | Follow-up length | Loss to follow-up rate |
|---------------------------------------|--------------------------------------|---------------------------------|---------------------------|--------------------------------------------------------------------------|-----------------------------------------------------------------|-----------------------|------------------|------------------------|
| Schuster M. et al. 2016 <sup>87</sup> | I                                    | I                               | A                         | A                                                                        | A                                                               | A                     | A                | A                      |
